# Supplementary material for: A unique morphology and interface dual-engineering strategy enables the holey C@VO2 cathode with enhanced storage kinetics for aqueous Zn-ion batteries
Source: Royal Society of Chemistry journal article supplement (doi:10.1039/d1ta00892g), 2021-01-01
Supplement: d1ta00892g1.pdf [file d1ta00892g1.pdf]

## Supplementary Information

### **A Unique Morphology and Interface Dual-Engineering Strategy Enables the Holey C@VO<sub>2</sub> Cathode with Enhanced Storage Kinetics for Aqueous Zn-ion Batteries**

Ming Yang<sup>a,1</sup>, Dingtao Ma<sup>a,b,1</sup>, Hongwei Mi<sup>a,c</sup>, Xiaodan Yang<sup>a</sup>, Yanyi Wang<sup>a,\*</sup>, Lingna Sun<sup>a,c</sup>, Peixin Zhang<sup>a,c,\*</sup>

<sup>a</sup> College of Chemistry and Environmental Engineering, Shenzhen University,  
Shenzhen, 518060, PR China

<sup>b</sup> Institute of Microscale Optoelectronics, Shenzhen University, Shenzhen, China,  
518060

<sup>c</sup> Guangdong Flexible Wearable Energy and Tools Engineering Technology Research  
Centre Shenzhen University, Shenzhen, Guangdong, 518060, PR China

E-mail: [pxzhang@szu.edu.cn](mailto:pxzhang@szu.edu.cn)

<sup>1</sup> These authors contribute equally to this work.

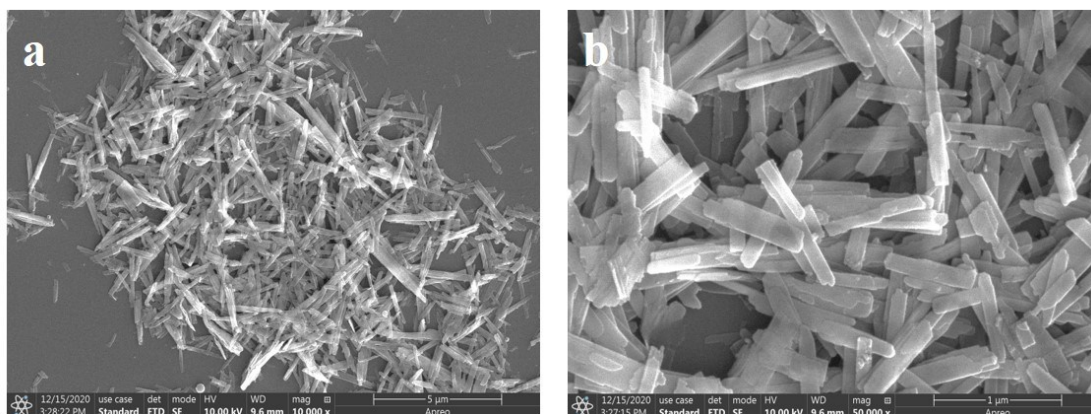

**Figure S1.** FESEM images of the VO<sub>2</sub> nanobelts at different magnification.

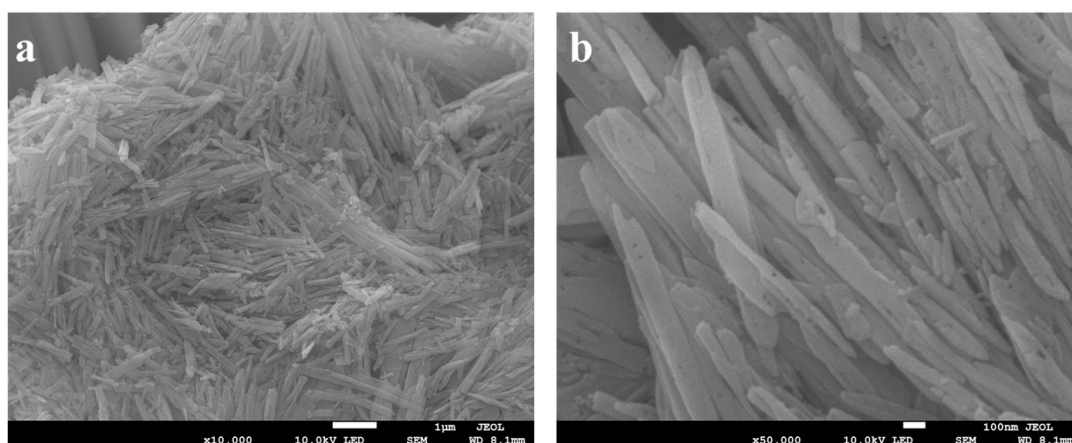

**Figure S2.** FESEM images of the holey VO<sub>2</sub> nanobelts at different magnification.

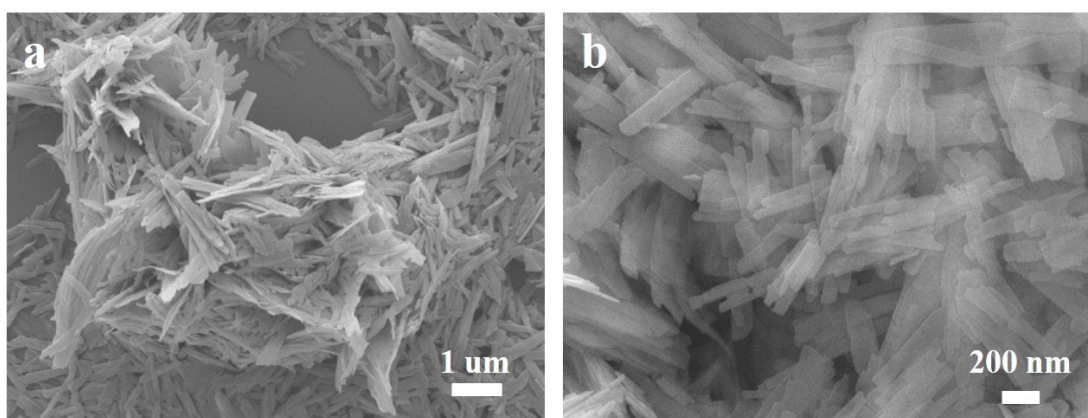

**Figure S3.** FESEM images of the C@VO<sub>2</sub> nanobelts at different magnification.

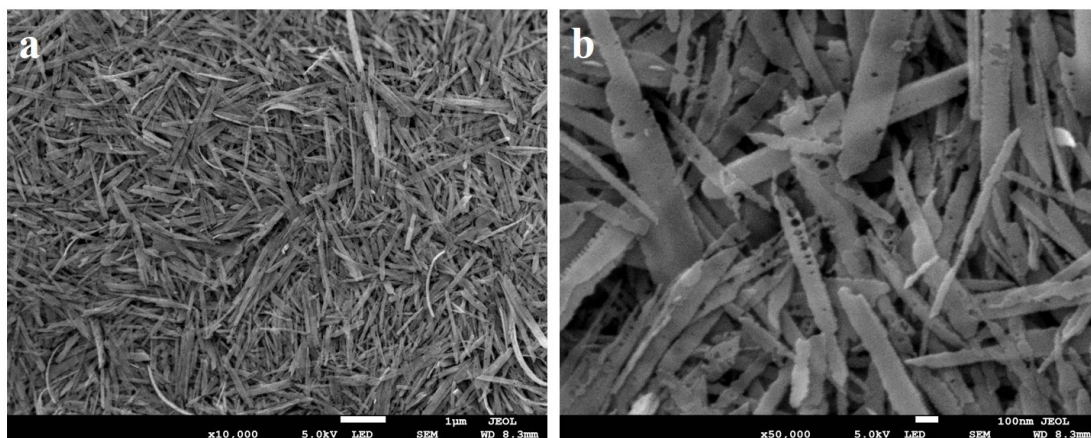

**Figure S4.** FESEM images of the holey C@VO<sub>2</sub> nanobelts at different magnification.

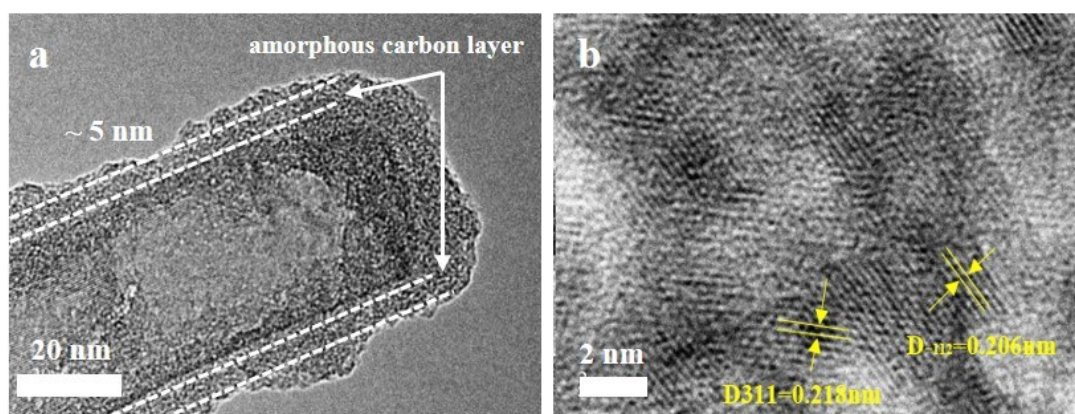

**Figure S5.** (a) TEM and (b) HRTEM images of the C@VO<sub>2</sub> nanobelts.

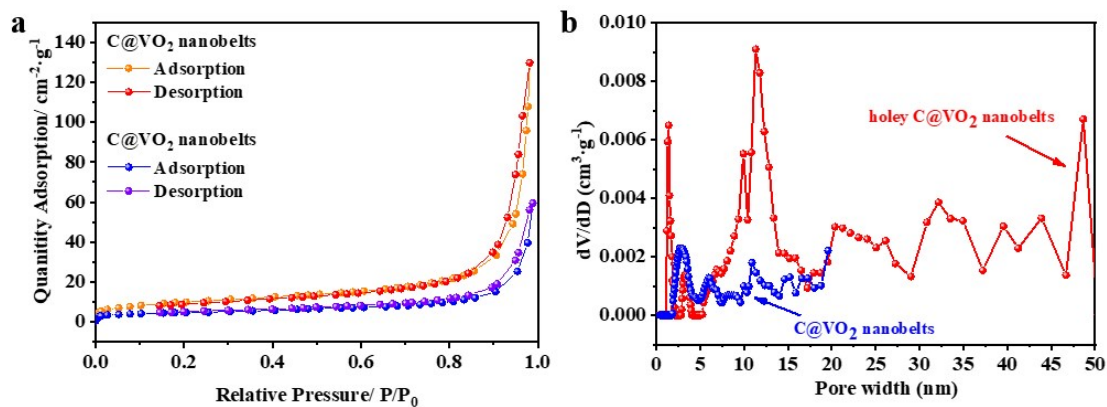

**Figure S6.** (a) N<sub>2</sub> adsorption/desorption isotherms and (b) corresponding pore size distribution of the holey C@VO<sub>2</sub> and C@VO<sub>2</sub> nanobelts.

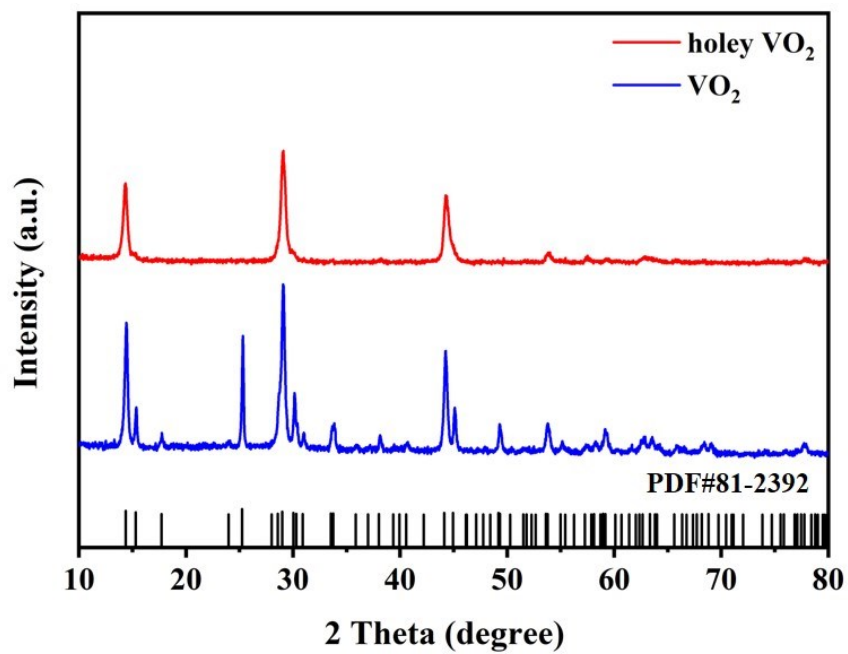

**Figure S7.** XRD pattern of the VO<sub>2</sub> and holey VO<sub>2</sub> nanobelts.

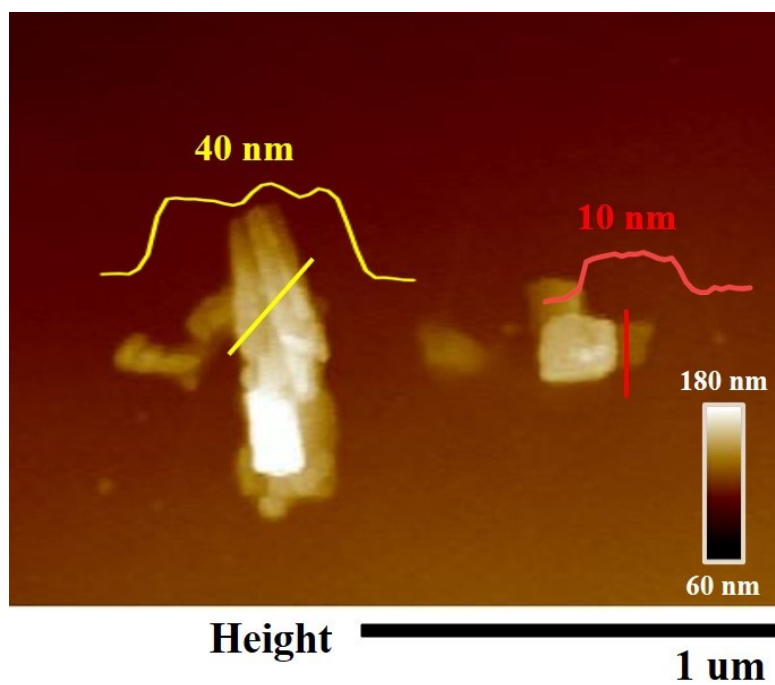

**Figure S8.** AFM image of the holey C@VO<sub>2</sub> nanobelts.

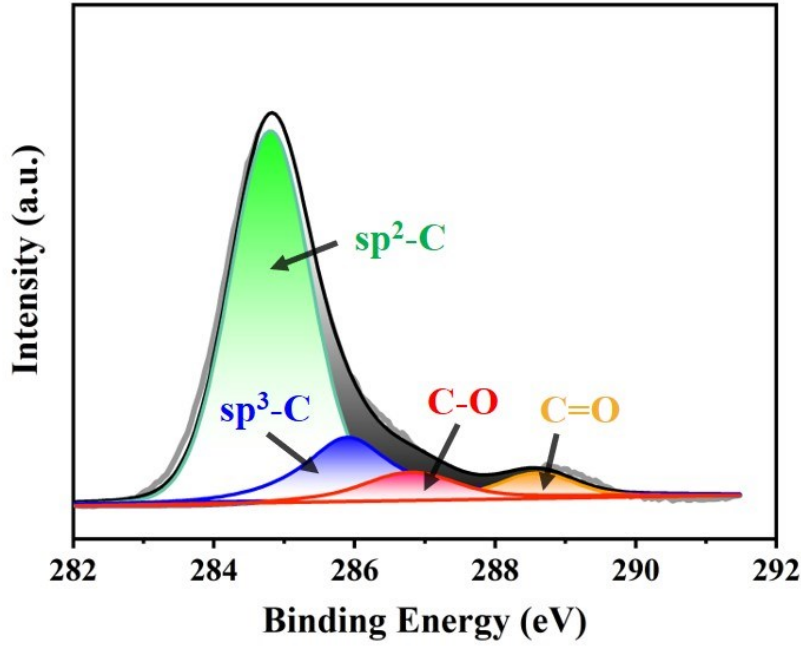

**Figure S9.** C 1s XPS spectrum of the holey C@VO<sub>2</sub> nanobelts.

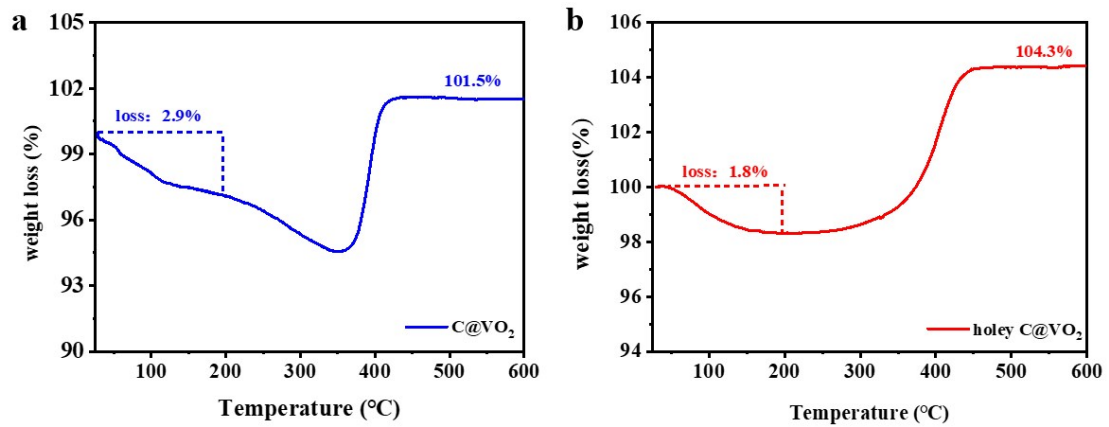

**Figure S10.** TGA curves of the C@VO<sub>2</sub>, and holey C@VO<sub>2</sub> composites.

TGA analysis was employed to estimate the mass fraction of carbon in the C@VO<sub>2</sub> and holey C@VO<sub>2</sub> composites. Normally, the calcination of C@VO<sub>2</sub> and holey C@VO<sub>2</sub> composite in the air would cause the release of adsorbed H<sub>2</sub>O molecules ( $G_{H_2O}\%$ ) and carbon fraction ( $G_{carbon}\%$ ), as well as the oxidation of VO<sub>2</sub> to V<sub>2</sub>O<sub>5</sub>. Among them, the increment of mass fraction resulted from the oxidation of VO<sub>2</sub> can be theoretically calculated to be  $(1/2 \times 181.88/82.94) \times 100 \text{ wt}\% - 1 = 9.6\%$ . Therefore, the mass fraction of carbon can be approximately calculated according to the following

relationship :

$$G_{carbon} \% = 109.6 \% - G_{H_2O} \% - G_{act} \%$$

As shown in Figure S10, there respectively exist a weight loss of about 2.9% and 1.8% before 200 °C for C@VO<sub>2</sub> and holey C@VO<sub>2</sub> composite, which should be ascribed to the release of adsorbed H<sub>2</sub>O molecules. Then, the residual mass fraction ( $G_{act} \%$ ) of C@VO<sub>2</sub> and holey C@VO<sub>2</sub> composite are respectively about 101.5 wt% and 104.3 wt% when the calcination temperature was raised up to 600 °C. Therefore, the mass fraction of carbon in the C@VO<sub>2</sub> and holey C@VO<sub>2</sub> composite can be respectively calculated to be 5.2 wt% and 3.5 wt%.

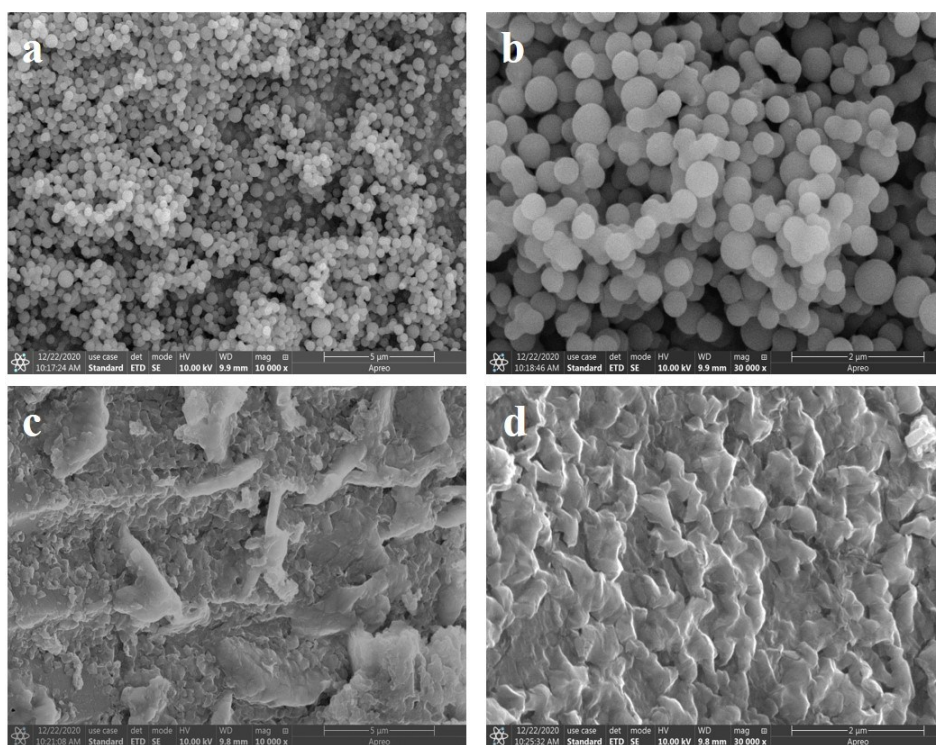

**Figure S11.** FESEM images of the carbon materials (a, b) derived from the glucose, and (c, d) after alkaline etching at different magnification.

As shown in Figure S11a and S11b, FESEM images indicate that the glucose-derived carbon material exhibits the relatively uniform sphere-like morphology. However, such carbon sphere material would turn into the carbon sheet material after alkaline etching treatment, as depicted in Figure S11c and S11d.

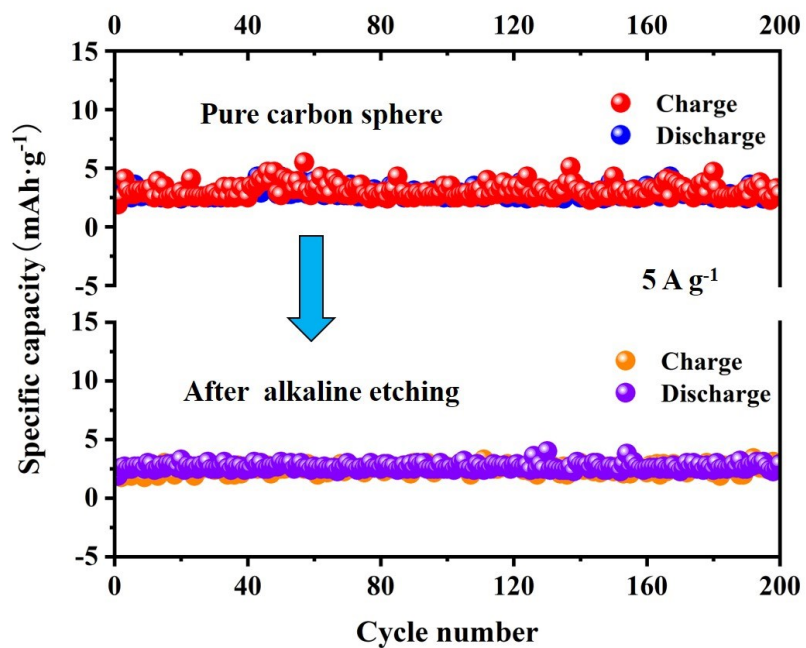

**Figure S12.** Cyclic performance of the glucose-derived carbon and alkaline etching carbon materials at  $5 \text{ A g}^{-1}$ .

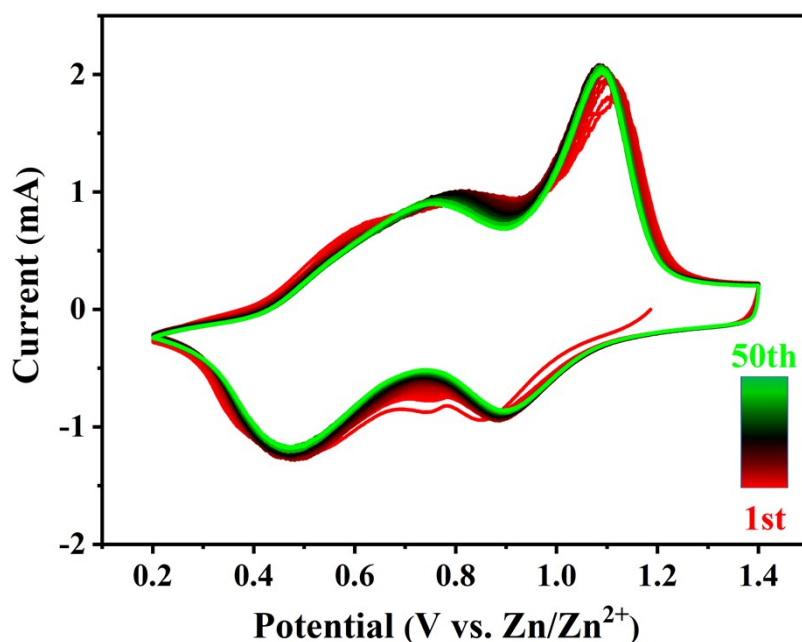

**Figure S13.** CV curves of the holey  $\text{C@VO}_2$  cathode in the first fifty cycles at the scan rate of  $1 \text{ mV s}^{-1}$ .

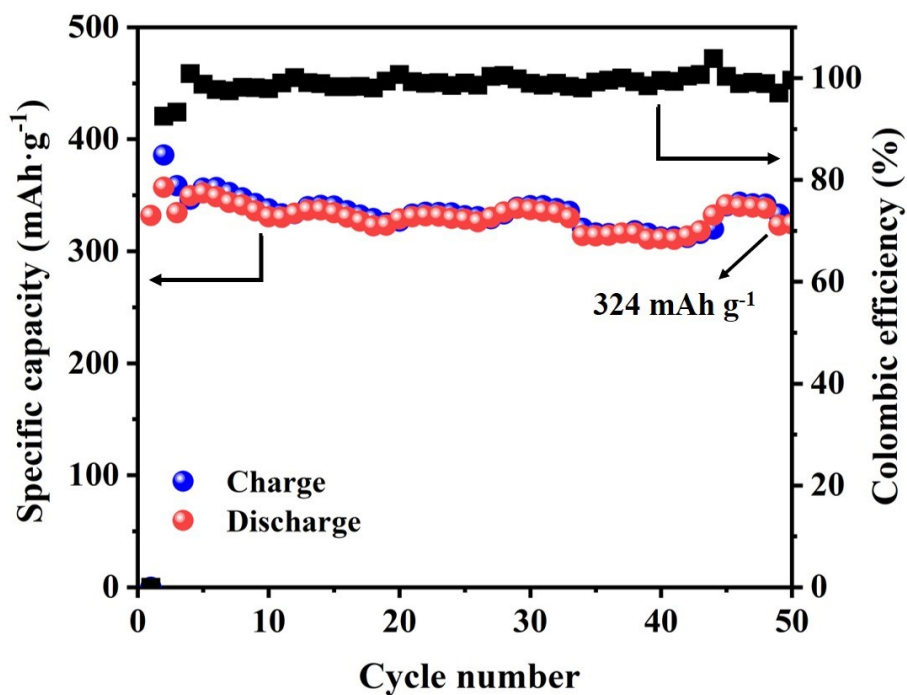

**Figure S14.** Cyclic performance of the holey VO<sub>2</sub> electrode at 0.2 A g<sup>-1</sup> and the corresponding Coulombic efficiency.

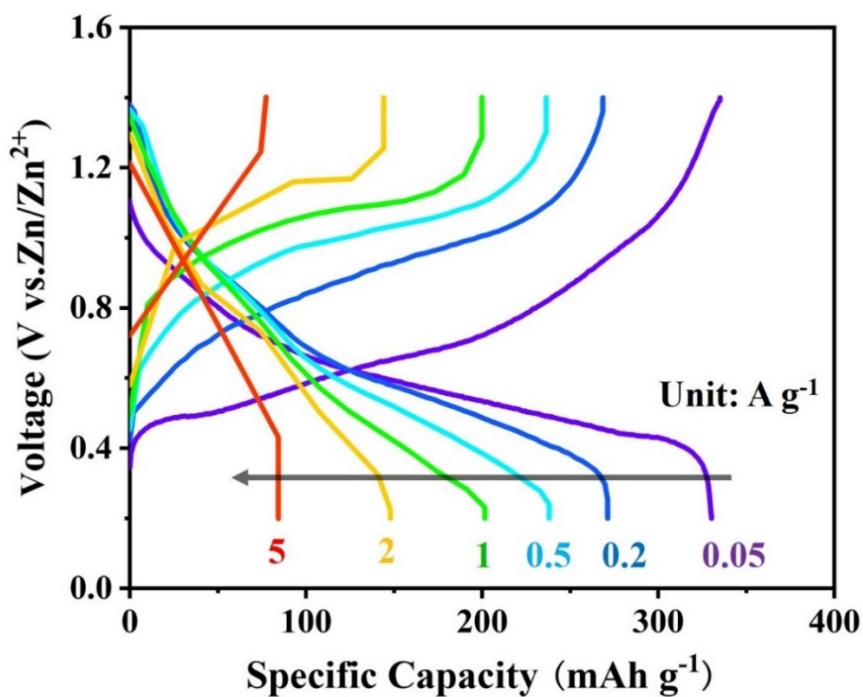

**Figure S15.** The charge-discharge curves of the C@VO<sub>2</sub> cathode under various current densities.



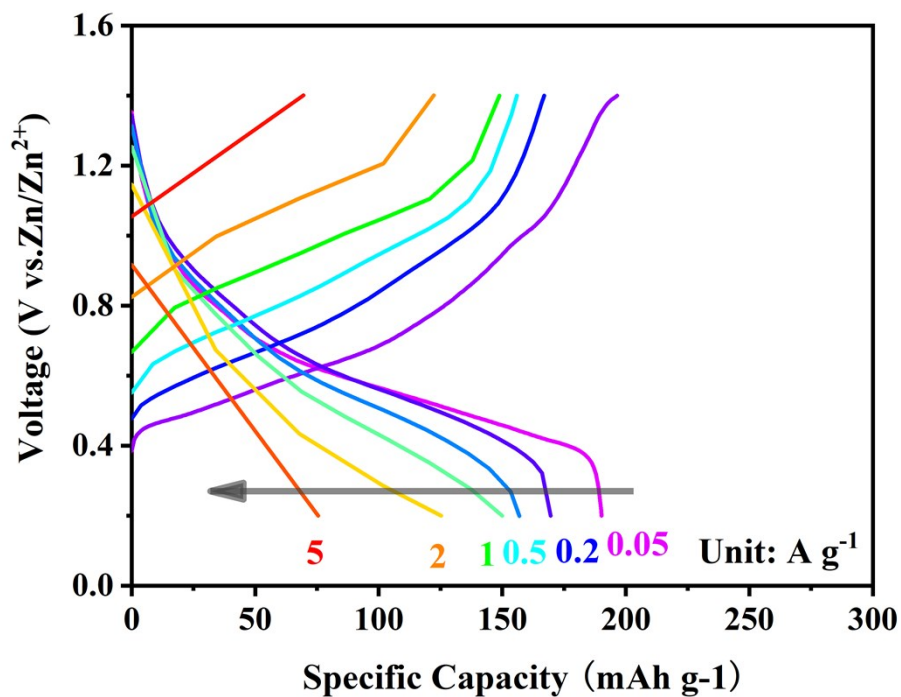

**Figure S16.** The charge-discharge curves of the VO<sub>2</sub> cathode under various current densities.

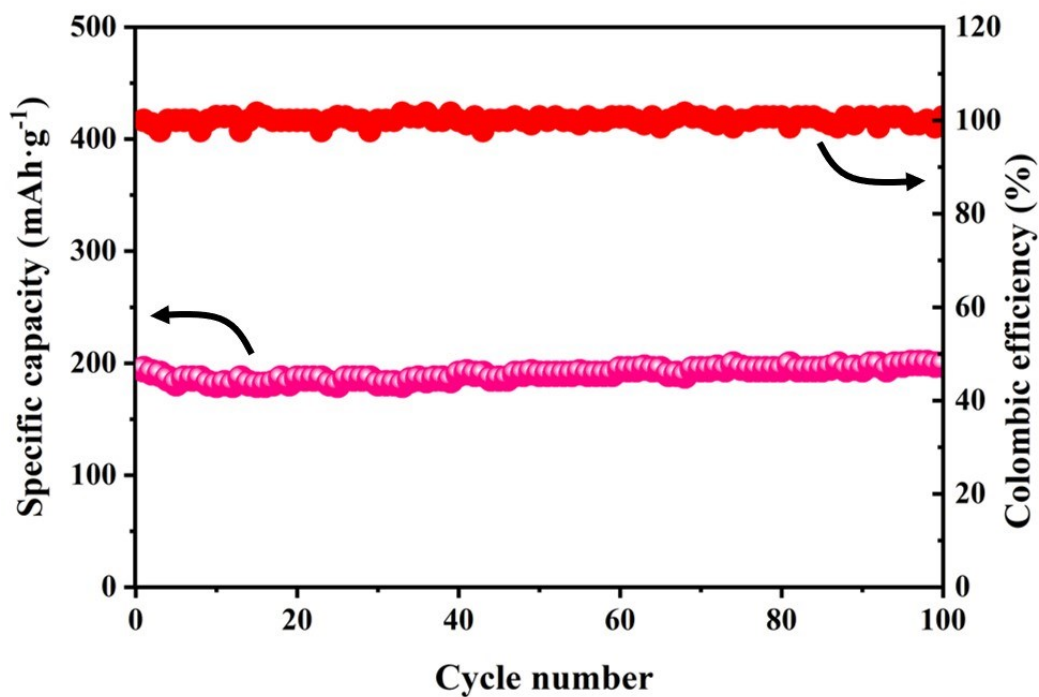

**Figure S17.** Cyclic performance of the C@VO<sub>2</sub> cathode at 5 A g<sup>-1</sup> and the corresponding Coulombic efficiency.

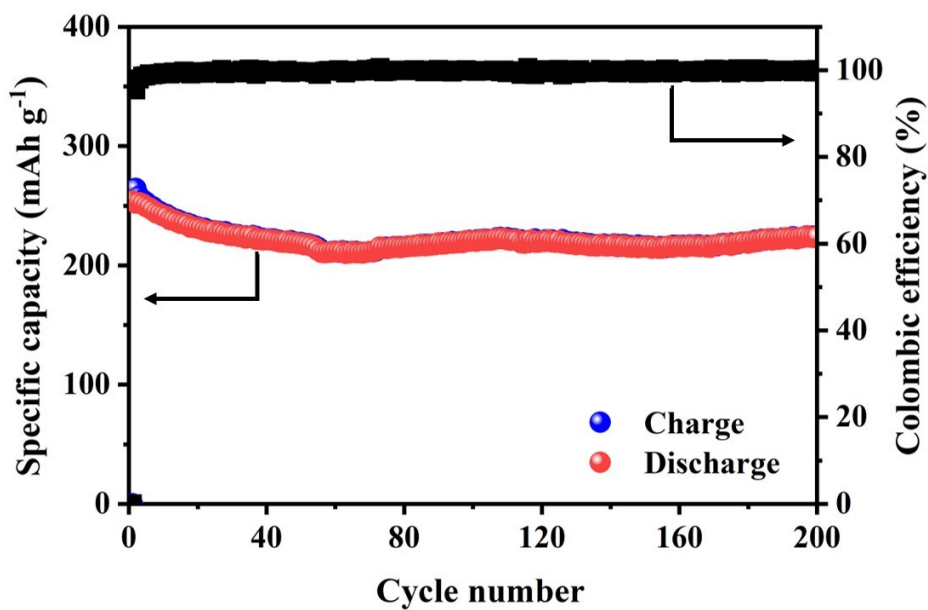

**Figure S18.** Cyclic performance of the holey VO<sub>2</sub> cathode at 5 A g<sup>-1</sup> and the corresponding Coulombic efficiency.

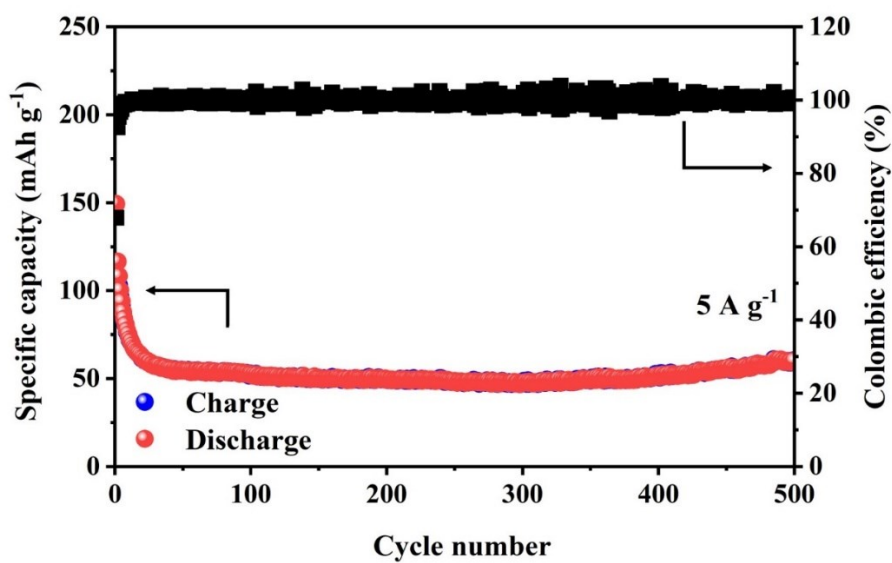

**Figure S19.** Cyclic performance of the VO<sub>2</sub> cathode at 5 A g<sup>-1</sup> and the corresponding Coulombic efficiency.

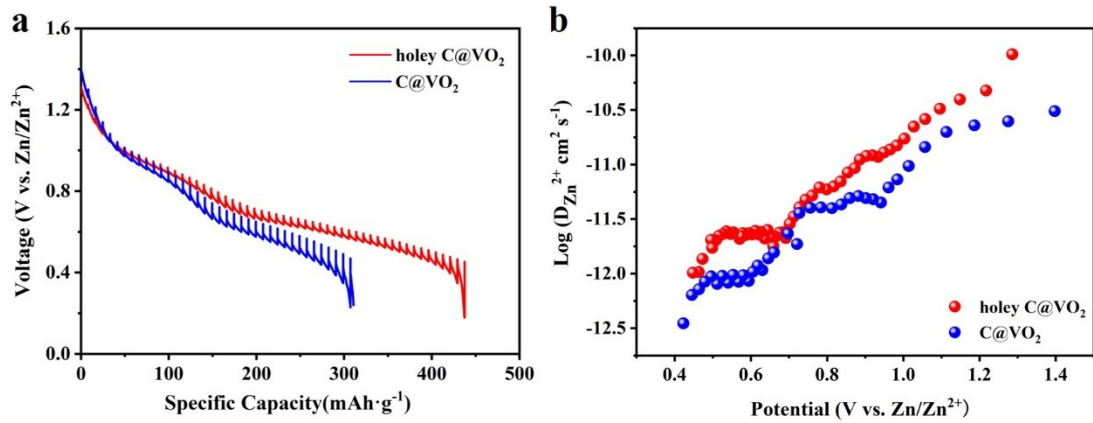

**Figure S20.** (a) GITT curves and (b) the corresponding Zn<sup>2+</sup> diffusion coefficient of C@VO<sub>2</sub> and holey C@VO<sub>2</sub> electrode in the discharge process.

The Galvanostatic Intermittent Titration Technique (GITT) was used to further investigate the kinetics of Zn<sup>2+</sup> solid-state diffusion of holey C@VO<sub>2</sub> and C@VO<sub>2</sub> during cycling. The GITT of discharge curves and corresponding diffusion coefficient of Zn<sup>2+</sup> ( $D_{Zn^{2+}}$ ) for holey C@VO<sub>2</sub> and C@VO<sub>2</sub> electrodes are respectively shown in Figure S20a and S20b. The results reveal that the  $D_{Zn^{2+}}$  of holey C@VO<sub>2</sub> ranges from  $1.3 \times 10^{-12}$  to  $1.2 \times 10^{-10}$  cm<sup>2</sup> s<sup>-1</sup> during the discharge process, which is higher than that of  $3.13 \times 10^{-13} \sim 3.2 \times 10^{-11}$  cm<sup>2</sup> s<sup>-1</sup> for C@VO<sub>2</sub> electrode, demonstrating the holey sample a better storage kinetics for AZIBs.

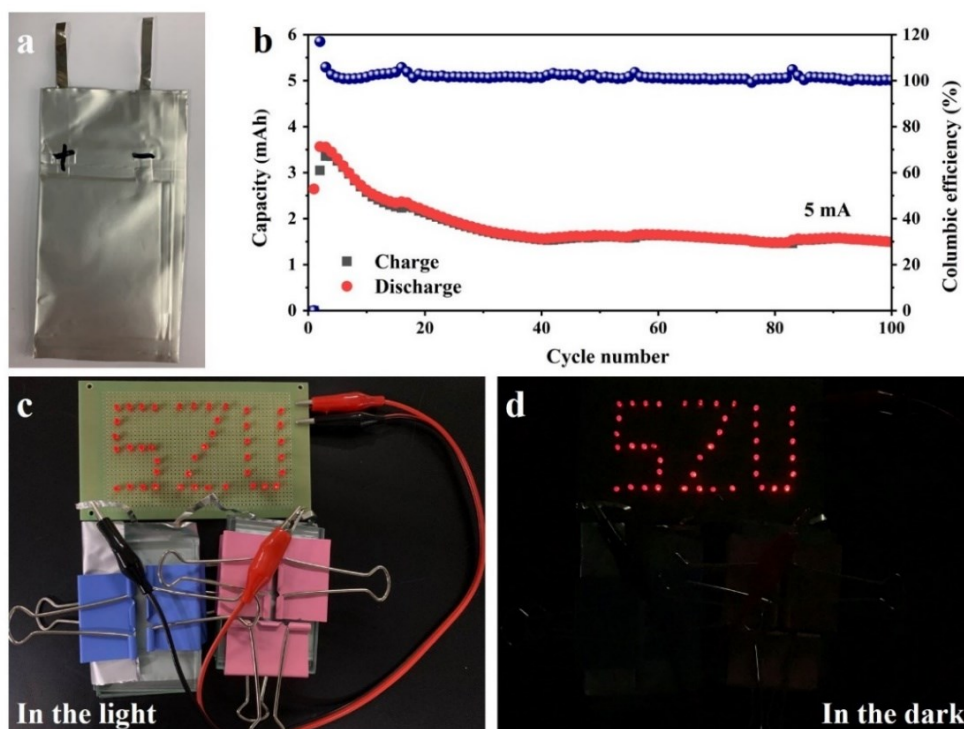

**Figure S21.** (a) Digital image of soft package battery constructed by the holey C@VO<sub>2</sub> cathode. (b) Cycle performance of soft package battery. (c, d) Two series batteries supply power for the pre-designed diode in the light and dark environments.

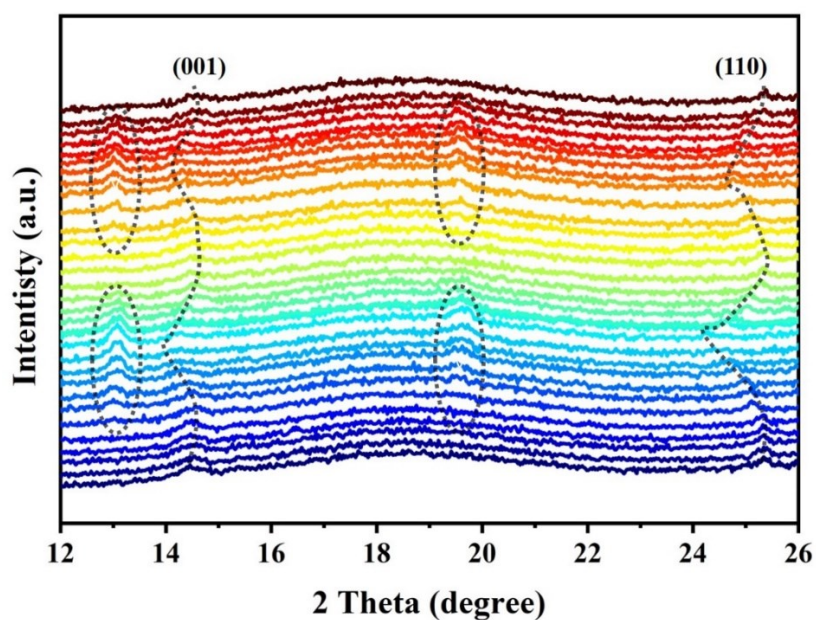

**Figure S22** XRD patterns of the holey C@VO<sub>2</sub> electrode collected at different states during cycling between 12° and 26°.

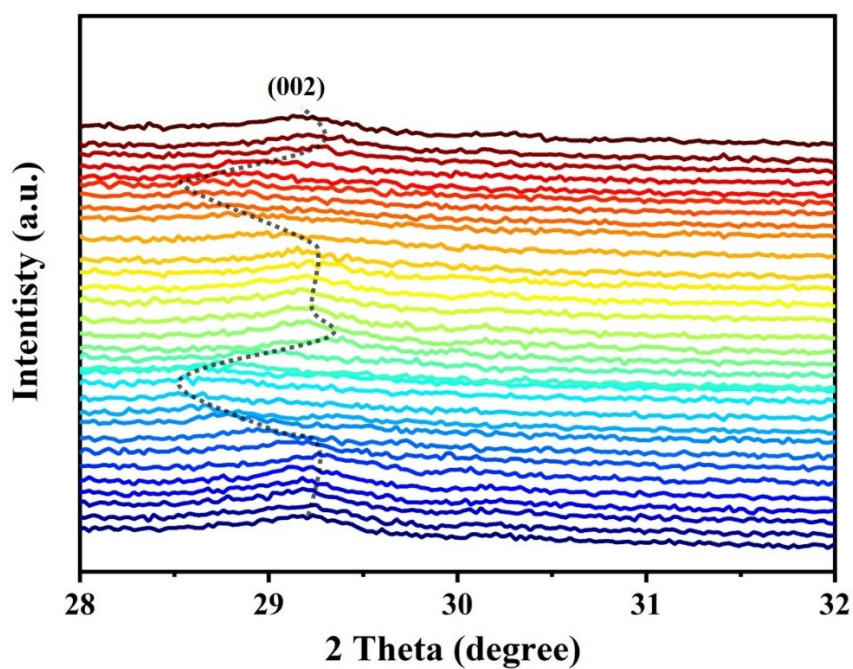

**Figure S23.** XRD patterns of the holey C@VO<sub>2</sub> electrode collected at different states during cycling between 28° and 32°.

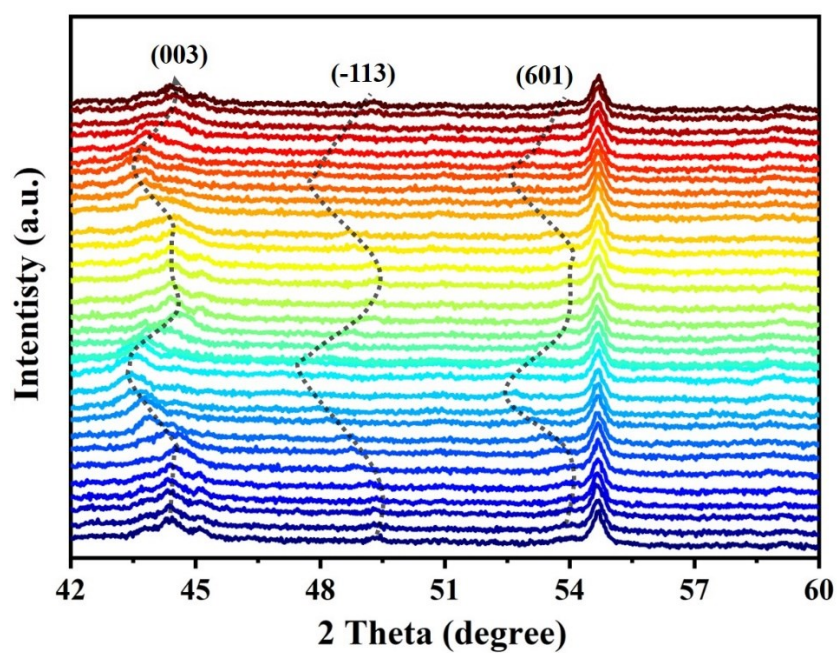

**Figure S24.** XRD patterns of the holey C@VO<sub>2</sub> electrode collected at different states during cycling between 42° and 60°.

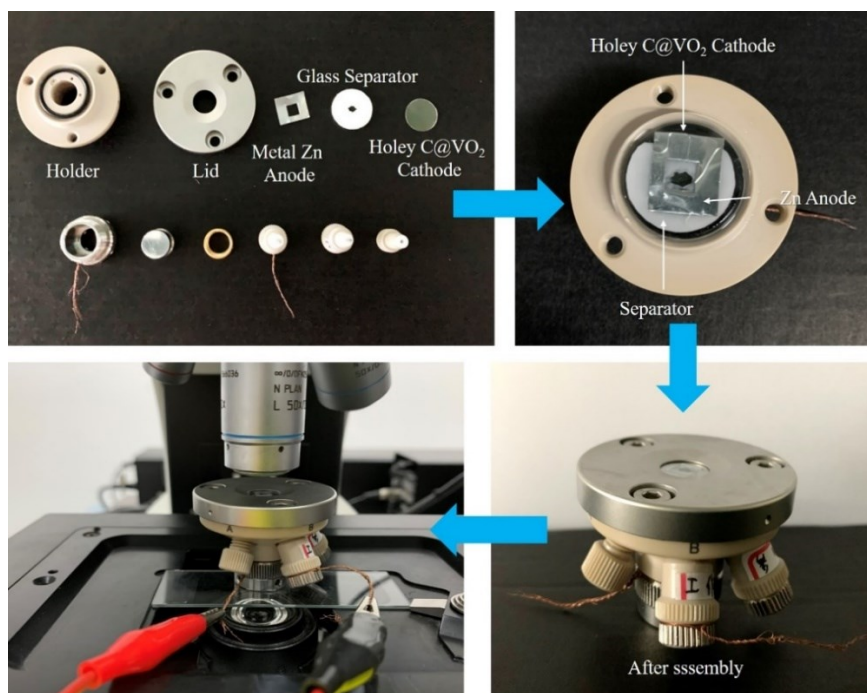

**Figure S25.** The assembly diagram of in-situ electrochemical Raman spectroscopy.

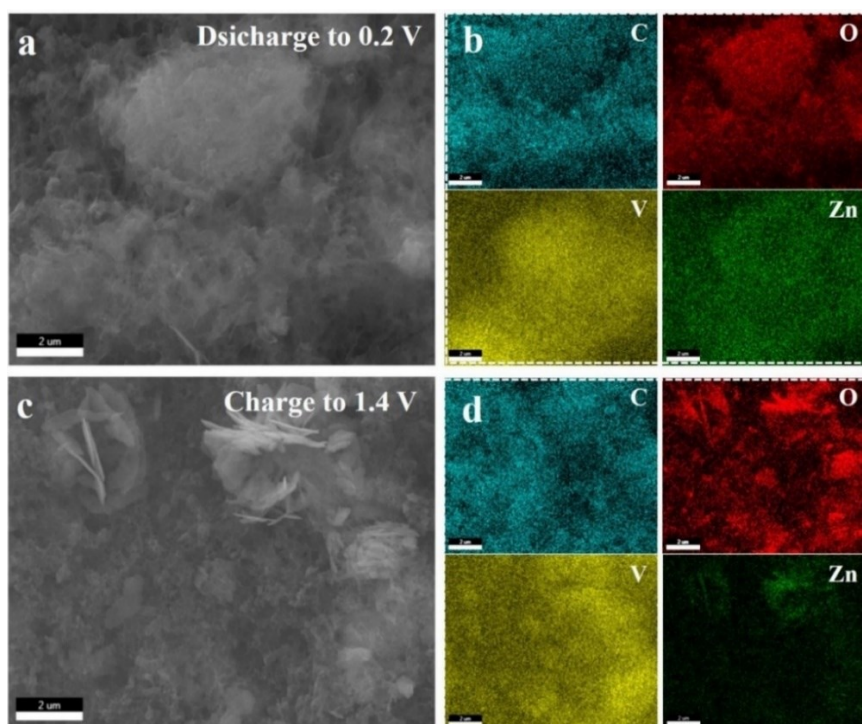

**Figure S26.** FESEM images and corresponding EDS mapping (C, O, V, and Zn elements) of the holey C@VO<sub>2</sub> electrode at the (a, b) fully discharged state and (c, d) fully charged state in the 15<sup>th</sup> cycle.

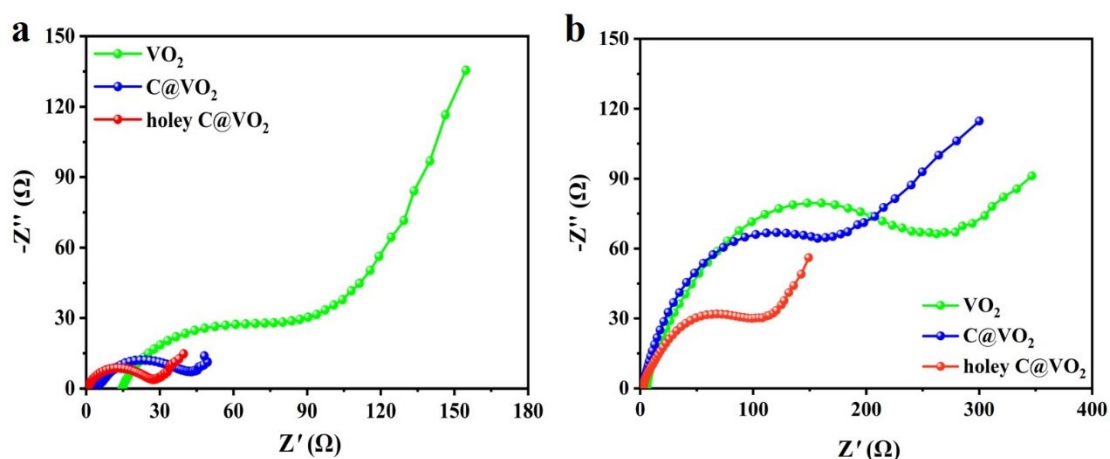

**Figure S27.** EIS spectra of the VO<sub>2</sub>, C@VO<sub>2</sub>, and holey C@VO<sub>2</sub> electrodes tested (a) before cycling, and (b) at fully charged state after 30<sup>th</sup> cycle.

To reveal the influence of carbon coating and alkaline etching on the transport kinetics of VO<sub>2</sub>-based electrodes, EIS spectrum was employed to study the charge transfer impedance ( $R_{ct}$ ) of VO<sub>2</sub>, C@VO<sub>2</sub> and holey C@VO<sub>2</sub> electrodes. As shown in Figure 27a, the fitted results indicate that the pure VO<sub>2</sub> exhibits the largest  $R_{ct}$  of 53 Ω, while the carbon coating can effectively reduce the charge transfer impedance (35 Ω). More interestingly, the smallest  $R_{ct}$  of holey C@VO<sub>2</sub> (22.3 Ω) demonstrates that alkaline etching treatment can further boost the charge transfer among the cathode interface, which might be benefited from the unique holey architecture. Besides, Figure 27b shows that the holey C@VO<sub>2</sub> electrode can still performs the smallest  $R_{ct}$  (76 Ω) after 30 cycles, comparing with the value of 153 Ω and 205 Ω for the C@VO<sub>2</sub> and VO<sub>2</sub> electrodes, respectively. These results imply the excellent rate capability of holey C@VO<sub>2</sub> electrode, and be consistent with the electrochemical performance test discussed above.

**Table S1** Summary of the comparison of electrochemical performance with other aqueous rechargeable Zn-ion batteries.

| Materials                                                             | Electrolyte                                                            | Voltage window | Electrochemical performance                      | Ref.      |
|-----------------------------------------------------------------------|------------------------------------------------------------------------|----------------|--------------------------------------------------|-----------|
| Holey C@VO <sub>2</sub>                                               | 3 M Zn(CF <sub>3</sub> SO <sub>3</sub> ) <sub>2</sub>                  | 0.2-1.4V       | 332mAh g <sup>-1</sup> (5 A g <sup>-1</sup> )    | This work |
| V <sub>2</sub> O <sub>5</sub>                                         | 2 M ZnSO <sub>4</sub>                                                  | 0.2-1.6V       | 219 mAh g <sup>-1</sup> (10 A g <sup>-1</sup> )  | [1]       |
| Zn <sub>0.25</sub> V <sub>2</sub> O <sub>5</sub> ·nH <sub>2</sub> O   | 1 M ZnSO <sub>4</sub>                                                  | 0.5-1.4V       | 262 mAh g <sup>-1</sup> (2.4 A g <sup>-1</sup> ) | [2]       |
| NaCa <sub>0.6</sub> V <sub>6</sub> O <sub>16</sub> ·3H <sub>2</sub> O | 3 M Zn(CF <sub>3</sub> SO <sub>3</sub> ) <sub>2</sub>                  | 0.4-1.5V       | 231 mAh g <sup>-1</sup> (2 A g <sup>-1</sup> )   | [3]       |
| Ba <sub>1.2</sub> V <sub>6</sub> O <sub>16</sub> ·3H <sub>2</sub> O   | 2 M ZnSO <sub>4</sub>                                                  | 0.3-1.4V       | 130 mAh g <sup>-1</sup> (5 A g <sup>-1</sup> )   | [4]       |
| Mn <sub>0.15</sub> V <sub>2</sub> O <sub>5</sub> ·nH <sub>2</sub> O   | 1 M Zn(ClO <sub>4</sub> ) <sub>2</sub>                                 | 0.2-1.7V       | 153 mAh g <sup>-1</sup> (10 A g <sup>-1</sup> )  | [5]       |
| H                                                                     |                                                                        | 0.2-1.6V       | 174 mAh g <sup>-1</sup> (5 A g <sup>-1</sup> )   | [6]       |
| 2                                                                     |                                                                        |                |                                                  |           |
| V                                                                     |                                                                        |                |                                                  |           |
| 3                                                                     |                                                                        |                |                                                  |           |
| O                                                                     |                                                                        |                |                                                  |           |
| 8                                                                     |                                                                        |                |                                                  |           |
| Nanowire/Graphene                                                     |                                                                        |                |                                                  |           |
| H                                                                     | 3 M Zn(CF <sub>3</sub> SO <sub>3</sub> ) <sub>2</sub>                  |                |                                                  |           |
| 2                                                                     |                                                                        |                |                                                  |           |
| V                                                                     |                                                                        |                |                                                  |           |
| 3                                                                     |                                                                        |                |                                                  |           |
| O                                                                     |                                                                        |                |                                                  |           |
| 8                                                                     |                                                                        |                |                                                  |           |
| NW/graphene                                                           |                                                                        |                |                                                  |           |
| H <sub>2</sub> V <sub>3</sub> O <sub>8</sub>                          |                                                                        |                |                                                  |           |
| V <sub>6</sub> O <sub>13</sub>                                        | 3 M Zn(CF <sub>3</sub> SO <sub>3</sub> ) <sub>2</sub>                  | 0.2-1.5V       | 230 mAh g <sup>-1</sup> (4 A g <sup>-1</sup> )   | [7]       |
| V <sub>3</sub> O <sub>7</sub> ·H <sub>2</sub> O                       | 3 M Zn(CF <sub>3</sub> SO <sub>3</sub> ) <sub>2</sub>                  | 0.1-1.7V       | 172 mAh g <sup>-1</sup> (5 A g <sup>-1</sup> )   | [8]       |
| rGO-VS <sub>2</sub>                                                   | 1 M ZnSO <sub>4</sub>                                                  | 0.2-1.8V       | 187 mAh g <sup>-1</sup> (5 A g <sup>-1</sup> )   | [9]       |
| VS <sub>4</sub> @GO                                                   | 1 M Zn(CF <sub>3</sub> SO <sub>3</sub> ) <sub>2</sub>                  | 0.4-1.8V       | 180 mAh g <sup>-1</sup> (1 A g <sup>-1</sup> )   | [10]      |
| VSe <sub>2</sub>                                                      | 2 M ZnSO <sub>4</sub>                                                  | 0.1-1.6V       | 146 mAh g <sup>-1</sup> (2 A g <sup>-1</sup> )   | [11]      |
| CoFe(CN) <sub>6</sub>                                                 | 4 M Zn(CF <sub>3</sub> SO <sub>3</sub> ) <sub>2</sub>                  | 0.7-2V         | 109 mAh g <sup>-1</sup> (3 A g <sup>-1</sup> )   | [12]      |
| PA-COF                                                                | 1 M ZnSO <sub>4</sub>                                                  | 0.2-1.6V       | 153 mAh g <sup>-1</sup> (1 A g <sup>-1</sup> )   | [13]      |
| Bi <sub>2</sub> S <sub>3</sub> -PEDOT                                 | 1 M Zn(CF <sub>3</sub> SO <sub>3</sub> ) <sub>2</sub><br>+ 21 M LiTFSI | 0-2.5V         | 131mAh g <sup>-1</sup> (2 A g <sup>-1</sup> )    | [14]      |
| Rich-Co <sub>3</sub> O <sub>4</sub>                                   | 2 M ZnSO <sub>4</sub> + 0.2<br>M CoSO <sub>4</sub>                     | 0.8-2.2V       | 158 mAh g <sup>-1</sup> (1 A g <sup>-1</sup> )   | [15]      |
| Mn <sub>3</sub> O <sub>4</sub>                                        | 2 M ZnSO <sub>4</sub>                                                  | 0.2-1.85V      | 125 mAh g <sup>-1</sup> (5 A g <sup>-1</sup> )   | [16]      |
| □-Mn□-                                                                | 2 M ZnSO <sub>4</sub> + 0.2                                            | 1 0-1 8V       | 120 mAh g <sup>-1</sup> (5 A g <sup>-1</sup> )   | [17]      |



|                                                  |                                                      |           |                                                     |      |
|--------------------------------------------------|------------------------------------------------------|-----------|-----------------------------------------------------|------|
|                                                  | M MnSO <sub>4</sub>                                  |           |                                                     |      |
| A-MnO <sub>2-δ</sub>                             | 2 M ZnSO <sub>4</sub> + 0.2<br>M MnSO <sub>4</sub>   | 1.0-1.9V  | 147 mAh g <sup>-1</sup> (1 A g <sup>-1</sup> )      | [18] |
| MnO                                              | 2 M ZnSO <sub>4</sub> + 0.2<br>M MnSO <sub>4</sub>   | 0.9-1.8V  | 115 mAh g <sup>-1</sup> (0.5 A g <sup>-1</sup> )    | [19] |
| Ca <sub>2</sub> MnO <sub>4</sub>                 | 2 M ZnSO <sub>4</sub> + 0.1<br>M MnSO <sub>4</sub>   | 0.8 -1.8V | 100 mAh g <sup>-1</sup> (1 A g <sup>-1</sup> )      | [20] |
| VO <sub>2</sub> (B) nanofibers                   | 3M Zn(CF <sub>3</sub> SO <sub>3</sub> ) <sub>2</sub> | 0.3-1.5V  | 220 mAh g <sup>-1</sup> (10 A g <sup>-1</sup> )     | [21] |
| VO <sub>2</sub> (B)/rGO                          | 1M ZnSO <sub>4</sub>                                 | 0.3-1.1V  | 320 mAh g <sup>-1</sup> at (5A g <sup>-1</sup> )    | [22] |
| RGO/VO <sub>2</sub>                              | 3M Zn(CF <sub>3</sub> SO <sub>3</sub> ) <sub>2</sub> | 0.3-1.3V  | 180 mAh g <sup>-1</sup> at (8.0 A g <sup>-1</sup> ) | [23] |
| VO <sub>2</sub> nanorods                         | 1M ZnSO <sub>4</sub>                                 | 0.2-1.3V  | 220 mAh g <sup>-1</sup> (3.0 A g <sup>-1</sup> )    | [24] |
| nsutite-type VO <sub>2</sub>                     | 2M ZnSO <sub>4</sub>                                 | 0.2-1.2V  | 178 mAh g <sup>-1</sup> (3.0 A g <sup>-1</sup> )    | [25] |
| VO <sub>2</sub> (D) hollow nanospheres           | 3M ZnSO <sub>4</sub>                                 | 0.2-1.5V  | 202 mAh g <sup>-1</sup> (5.0 A g <sup>-1</sup> )    | [26] |
| Ni-doped VO <sub>2</sub>                         | 3M Zn(CF <sub>3</sub> SO <sub>3</sub> ) <sub>2</sub> | 0.2-1.4V  | 182 mA h g <sup>-1</sup> (5 Ag <sup>-1</sup> )      | [27] |
| VO <sub>2</sub> (B) nanobelts                    | 3M Zn(CF <sub>3</sub> SO <sub>3</sub> ) <sub>2</sub> | 0.2-1.4V  | 200 mAh g <sup>-1</sup> (5.0 A g <sup>-1</sup> )    | [28] |
| VO <sub>2</sub> ·0.2H <sub>2</sub> O nanocuboids | 2M ZnSO <sub>4</sub>                                 | 0.4-1.1V  | 215 mA h g <sup>-1</sup> (8 Ag <sup>-1</sup> )      | [29] |
| VO <sub>2</sub> nanoplate                        | 1M ZnSO <sub>4</sub>                                 | 0.2-1.0V  | 136 mAhg <sup>-1</sup> (2A g <sup>-1</sup> )        | [30] |

## Reference

- [1] Y. Li, Z. Huang, P.K. Kalambate, Y. Zhong, Z. Huang, M. Xie, Y. Shen, Y. Huang, *Nano Energy*, 2019, **60**, 752-759.
- [2] D. Kundu, B.D. Adams, V. Duffort, S.H. Vajargah, L.F. Nazar, *Nat. Energy*, 2016, **1**, 161119.
- [3] K. Zhu, T. Wu, K. Huang, *Adv. Energy Mater.*, 2019, **9**, 1901968.
- [4] X. Wang, B. Xi, X. Ma, Z. Feng, Y. Jia, J. Feng, Y. Qian, S. Xiong, *Nano Lett.* 2020, **20**, 2899-2906.
- [5] H. Geng, M. Cheng, B. Wang, Y. Yang, Y. Zhang, C.C. Li, *Adv. Funct. Mater.* 2019, **30**, 1907684.

- [6] P. He, Y. Quan, X. Xu, M. Yan, W. Yang, Q. An, L. He, L. Mai, *Small*, 2017, **13**, 1702551.
- [7] J. Shin, D.S. Choi, H.J. Lee, Y. Jung, J.W. Choi, H, *Adv. Energy Mater.*, 2019, **9**, 1900083.
- [8] Z. Cao, H. Chu, H. Zhang, Y. Ge, R. Clemente, P. Dong, L. Wang, J. Shen, M. Ye, P.M. Ajayan, *J. Mater. Chem. A*, 2019, **7**, 25262-25267.
- [9] T. Chen, X. Zhu , X. Chen, Q. Zhang, X. Pan, *J. power Sources*, 2020, **477**, 228652.
- [10] H. Qin, Z. Yang, L. Chen, X. Chen, L. Wang, *J. Mater. Chem. A*, 2018, **6**, 23757-23765.
- [11] L. Wang, Z. Wu, M. Jiang, J. Lu, Q. Huang, Y. Zhang, L. Fu, M. Wu, Y. Wu, *J. Mater. Chem. A*, 2020, **8**, 9313-9321.
- [12] L. Ma, S. Chen, C. Long, X. Li, Y. Zhao, Z. Liu, Z. Huang, B. Dong, J.A. Zapien, C. Zhi, *Adv. Energy Mater.*, 2019,**9**, 1902446.
- [13] W. Wang, V.S. Kale, Z. Cao, S. Kandambeth, W. Zhang, J. Ming, P.T. Parvatkar, E. Abou-Hamad, O. Shekhah, L. Cavallo, M. Eddaoudi, H.N. Alshareef, *ACS Energy Lett.*, 2020, **5**, 2256-2264.
- [14] Y. Zhao, L. Ma, Y. Zhu, P. Qin, H. Li, F. Mo, D. Wang, G. Liang, Q. Yang, W. Liu, C. Zhi, *ACS Nano*, 2019,**13**, 7270-7280.
- [15] L. Ma, S. Chen, H. Li, Z. Ruan, Z. Tang, Z. Liu, Z. Wang, Y. Huang, Z. Pei, J.A. Zapien, C. Zhi, *Energy Environ. Sci.*, 2018, **11**, 521-2530.
- [16] Q. Tan, X. Li, B. Zhang, X. Chen, Y. Tian, H. Wan, L. Zhang, L. Miao, C. Wang, Y. Gan, J. Jiang, Y. Wang, H. Wang, *Adv. Energy Mater.*, 2020, **10**, 2001050.
- [17] T. Xiong, Z.G. Yu, H. Wu, Y. Du, Q. Xie, J. Chen, Y.W. Zhang, S.J. Pennycook, W.S.V. Lee, J. Xue, *Adv. Energy Mater.*, 2019, **9**, 1803815.
- [18] Y. Cai, R. Chua, S. Huang, H. Ren, M. Srinivasan, *Chem. Eng. J.*, 2020, **396**, 125211.
- [19] W. Li, X. Gao, Z. Chen, R. Guo, G. Zou, H. Hou, W. Deng, X. Ji, J. Zhao, *Chem. Eng. J.*, 2020, **402**, 125509.

- [20] S. Guo, S. Liang, B. Zhang, G. Fang, D. Ma, J. Zhou, *ACS Nano*, 2019, **13**, 13456-13464.
- [21] W. Zhang, Y. Xiao, C. Zuo, W. Tang, G. Liu, S. Wang, W. Cai, S. Dong, P. Luo, *ChemSusChem* 2021, **14**, 971.
- [22] F. Cui, J. Zhao, D. Zhang, Y. Fang, F. Hu, K. Zhu, *Chem. Eng J.*, 2020, **390**, 124128.
- [23] X. Dai, F. Wan, L.L. Zhang, H.M. Cao, Z.Q. Niu, *Energy Storage Mater.*, 2019, **17**, 143-150.
- [24] L. Chen, Y. Ruan, G. Zhang, Q. Wei, Y. Jiang, T. Xiong, P. He, W. Yang, M. Yan, Q. An, L. Mai, *Chem. Mater.*, 2019, **31**, 699-706.
- [25] Z. Cao, L. Wang, H. Zhang, X. Zhang, J. Liao, J. Dong, J. Shi, P. Zhuang, Y. Cao, M. Ye, J. Shen, P.M. Ajayan, *Adv. Funct. Mater.*, 2020, **30**, 202000472.
- [26] L Chen, Z.H Yang, Y.G Huang, *Nanoscale*, 2019, **11**, 13032
- [27] Y. Cai, R. Chua, Z. Kou, H. Ren, D. Yuan, S. Huang, S. Kumar, V. Verma, P. Amonpattaratkit, M. Srinivasan, *ACS Appl. Mater. Interfaces*, 2020, **12**, 36110-36118.
- [28] K. Zhu, T. Wu, S. Sun, W. van den Bergh, M. Stefik, K. Huang, *Energy Storage Mater.*, 2020, **29**, 60-70.
- [29] D. Jia, K. Zheng, M. Song, H. Tan, A. Zhang, L. Wang, L. Yue, D. Li, C. Li, J. Liu, *Nano Res.*, 2020, **13**, 215-224.
- [30] Q. Pang, H. Zhao, R. Lian, Q. Fu, Y. Wei, Sarapulova, J. Sun, C. Wang, G. Chen, Ehrenberg, *J. Mater. Chem. A*, 2020, **8**, 9567-9578
